# Supplementary material for: Tumorigenicity of EGFR- and/or HER2-Positive Breast Cancers Is Mediated by Recruitment of Tumor-Associated Macrophages
Source: MDPI journal article supplement (doi:10.3390/ijms24021443), 2023-01-11
Supplement: s1 [file s1]

## Supplementary Figure Legends

**Supplementary Figure S1. HER2 overexpression leads to increase of CCL2 transcript levels in Hs578T cells.** Transcript levels of *HER2* and *CCL2*, in Vec and HER2-overexpressed Hs578T cells were analyzed by real-time PCR. Values were normalized to *ACTB*. \*,  $P < 0.05$

**Supplementary Figure S2. Effect of conditioned culture media of HER2 overexpressing cells on the expression of CCL2, CCL5, and IL-6.** (A, B, C) Transcript levels of *CCL2*, *CCL5*, and *IL-6* following treatment with conditioned culture media obtained from Vec and HER2-overexpressed MDA-MB231 cells were analyzed by real-time PCR. Values were normalized to *ACTB*. *ns*, non-significant.

**Supplementary Figure S3. Effect of Trastuzumab on the expression of CCL2, CCL5, IL-6, and IL-8.** (A, B, C, D) Transcript levels of *CCL2*, *CCL5*, *IL-6*, and *IL-8* in Vec and HER2-overexpressed MDA-MB231 cells treated with 50  $\mu$ M trastuzumab were analyzed by real-time PCR. Values were normalized to *ACTB*. *ns*, non-significant; \*,  $P < 0.05$ ; \*\*,  $P < 0.005$ .

**Supplementary Figure S4. Effect of neratinib on the expression of CCL5, IL-6, and IL-8.** Transcript levels of *CCL5*, *IL-6*, and *IL-8* in Vec and HER2-overexpressed MDA-MB231 cells treated with 2  $\mu$ M neratinib were analyzed by real-time PCR. Values were normalized to *ACTB*. \*,  $P < 0.05$ ;  $\phi$ ,  $p < 0.05$ .
