# Supplementary material for: Tumorigenicity of EGFR- and/or HER2-Positive Breast Cancers Is Mediated by Recruitment of Tumor-Associated Macrophages
Source: MDPI journal article supplement (doi:10.3390/ijms24021443), 2023-01-11
Supplement: s1 [file s1]

Supplementary Table S1. Primer sequences used for real time-polymerase chain reactions

| Gene name | Primer      | Sequence (5' to 3')       |
|-----------|-------------|---------------------------|
| ACTB      | Forward (F) | TCACCATTGGCAATGAGCGGT     |
|           | Reverse (R) | AGTTTCGTGGATGCCACAGGACT   |
| EGFR      | F           | CATGTCGATCTTCCAGA         |
|           | R           | GGGACAGCTTGGATCACACT      |
| HER2      | F           | CACTTCAACCACAGTGGCAT      |
|           | R           | ATTCACATACTCCCTGGGGA      |
| CCL2      | F           | CAGCCAGATGCAATCAATGC      |
|           | R           | GCACTGAGATCTTCCTATTGGTGAA |
| CCL5      | F           | CCTCGCTGTCATCCTCATT       |
|           | R           | AGCAGCAGGGTGTGGTGTC       |
| IL6       | F           | AATTCGGTACATCCTCGACGG     |
|           | R           | GGTTGTTTTCTGCCAGTGCC      |
| IL8       | F           | AGGGTTGCCAGATGCAATAC      |
|           | R           | AAACCAAGGCACAGTGGAAC      |
| IL1B      | F           | GCCCTAAACAGATGAAGTGCTC    |
|           | R           | GAACCAGCATCTTCCTCAG       |
| CD11B     | F           | CAGCCTTTGACCTTATGTCATGG   |
|           | R           | CCTGTGCTGTAGTCGCACT       |
