# Supplementary material for: Tumorigenicity of EGFR- and/or HER2-Positive Breast Cancers Is Mediated by Recruitment of Tumor-Associated Macrophages
Source: Int J Mol Sci. 2023 Jan 11;24(2):1443. doi: 10.3390/ijms24021443 (PMC9866454; doi:10.3390/ijms24021443)
Supplement: Supplementary file 1 [file ijms-24-01443-s001.zip]

Archive with 7 entries (7 files):
- FigS1.tiff
- FigS2.tiff
- FigS3.tiff
- FigS4.tiff
- Supplementary Figure Legends.pdf
- Supplementary Materials and Methods.pdf
- Supplementary Table S1.pdf
